# Supplementary material for: Parenting Daughters Does Not Increase Monetary Prosocial Behavior
Source: Atypon-hosted journal article supplement (doi:10.1027/1864-9335/a000508), 2022-11-01
Supplement: 1864-9335_a000508_esm1.pdf [file 1864-9335_a000508_esm1.pdf]

## Electronic Supplementary Materials 1

### Parenting daughters does not increase monetary prosocial behavior: evidence from the Dictator Game

#### Measures

##### Donation (UE72 Experiment, SOEP-IS, Goebel et al., 2018)

**General instructions.** Now, we would like to give you two tasks with which you could earn money again. In the two tasks, you have to decide whether to split a certain amount of money between another household and you or not. At the end, every 7th participant will be selected and their decision in one of the two tasks will be paid out. Whether your decision will be paid out is determined at the end of the module. The actual payment will occur at the end of the interview.

**Domestic recipient.** You were paired with another household in Germany who is also a participant in the innovation sample “Leben in Deutschland” but is not taking part in this interview. This household belongs to the poorest 10 percent of households in Germany. Now, you have 50 EUR at your disposal and can split this amount between the other household and you in any way you want. If this task is selected for payout, you will receive the amount you decided to keep at the end of the interview. The amount you want to give the other household will be given in full to the other household (without transaction costs) at the end of the field period by Kantar Public. In full means that every given euro will be received by the other household 1:1. I ask you to make this decision alone now.

How much of the 50 EUR do you want to keep and how much do you want to give the other household?

I keep EUR ... [1] and give EUR [2] to the other household.

**Foreign recipient.** You were paired with another household in Kenya or Uganda. This household belongs to the poorest 10 percent of households worldwide. Now, you have 50 EUR at your disposal and can split this amount between the other household and you in any way you want. If this task is selected for payout, you will receive the amount you decided to keep at the end of the interview. The amount you want to give the other household will be given in full to the other household (without transaction costs) at the end of the field period by Heidelberg University via a charitable organization. In full means that every given euro will be received by the other household 1:1. A leaflet with information about the donations will be given to you after you have made your decision. I ask you to make this decision alone now.

How much of the 50 EUR do you want to keep and how much do you want to give the other household?

I keep EUR ... [1] and give EUR [2] to the other household.

#### Independent variables

**Number of daughters/Number of children.** The number and sex of children were determined based on the birth data provided by the SOEP for each participant.

**Female participant** ( $I = \textit{female}$ ,  $0 = \textit{male}$ ). Biological sex codes of each participant in the SOEP as “male” or “female” were used.

**Married** ( $I = \textit{yes}$ ,  $0 = \textit{no}$ ). Marital status was determined based on SOEP-data from the 2017 wave.

**Income.** Income corresponds to monthly net income (in EUR) and was measured using self-reports responding to the question about their monthly net income from work, including overtime pay, but excluding vacation or back pay in the 2017 wave. The imputed values were provided by the SOEP (for the imputation process see Frick & Grapka, 2014). As the distribution was right-skewed, we log-transformed values.

**Age.** Age was measured based on participants’ date of birth as reported in the SOEP. To compute age in years, we subtracted the year of birth from the year of the data collection period.

**Education.** Education corresponds to years of education. This variable was computed and provided by the SOEP, taking years of schooling, professional training, and university education into account.

**Catholic/Protestant/Other religion** ( $I = \textit{yes}$ ,  $0 = \textit{no}$ ). Religion was obtained from the life course data provided by the SOEP, but only entries from the year of the 2017 wave were used.

## Tables

**Table S1. Descriptive statistics.**

| <b>Overall (N = 1,461)</b>                                      |                    |
|-----------------------------------------------------------------|--------------------|
| <b>Sex</b>                                                      |                    |
| Female                                                          | 805 (55.1%)        |
| Male                                                            | 656 (44.9%)        |
| <b>Age in years</b>                                             |                    |
| Mean                                                            | 54.016             |
| SD                                                              | 18.836             |
| Median                                                          | 56.000             |
| Q1, Q3                                                          | 40.000, 69.000     |
| <b>Religion</b>                                                 |                    |
| N-Miss                                                          | 853                |
| Catholic                                                        | 174 (28.6%)        |
| Islamic Religion                                                | 4 (0.7%)           |
| Member of an Islamic religious community                        | 4 (0.7%)           |
| Member of another Christian denomination or religious community | 10 (1.6%)          |
| Member of another religious community                           | 5 (0.8%)           |
| No                                                              | 92 (15.1%)         |
| Non-Denominational                                              | 106 (17.4%)        |
| Other Christian Religious Organization                          | 13 (2.1%)          |
| Protestant                                                      | 200 (32.9%)        |
| <b>Marital status</b>                                           |                    |
| N-Miss                                                          | 1                  |
| Single                                                          | 338 (23.2%)        |
| Divorced                                                        | 178 (12.2%)        |
| Married                                                         | 766 (52.5%)        |
| Married, But Separated                                          | 36 (2.5%)          |
| Registered same sex partnership                                 | 4 (0.3%)           |
| Widowed                                                         | 138 (9.5%)         |
| <b>Net household income in €</b>                                |                    |
| Mean                                                            | 2890.486           |
| SD                                                              | 1745.740           |
| Median                                                          | 2700.000           |
| Q1, Q3                                                          | 1700.000, 3800.000 |
| <b>Number of biological daughters</b>                           |                    |
| Mean                                                            | 0.771              |
| SD                                                              | 0.900              |
| Median                                                          | 1.000              |
| Q1, Q3                                                          | 0.000, 1.000       |
| <b>Number of biological sons</b>                                |                    |
| Mean                                                            | 0.687              |
| SD                                                              | 0.834              |
| Median                                                          | 0.000              |
| Q1, Q3                                                          | 0.000, 1.000       |
| <b>Number of biological children</b>                            |                    |
| Mean                                                            | 1.458              |
| SD                                                              | 1.236              |

---

| <b>Overall (N = 1,461)</b> |                |
|----------------------------|----------------|
| Median                     | 2.000          |
| Q1, Q3                     | 0.000, 2.000   |
| <b>Years of education</b>  |                |
| Mean                       | 12.380         |
| SD                         | 2.723          |
| Median                     | 11.500         |
| Q1, Q3                     | 10.500, 14.000 |

---

**Table S2. Correlations between key variables**

| Variable                           | 1                      | 2                   | 3                   | 4                      | 5                   | 6                   |
|------------------------------------|------------------------|---------------------|---------------------|------------------------|---------------------|---------------------|
| 1. Age                             |                        |                     |                     |                        |                     |                     |
| 2. Income                          | -.22**<br>[-.27, -.17] |                     |                     |                        |                     |                     |
| 3. Married                         | .21**<br>[.16, .26]    | .29**<br>[.24, .34] |                     |                        |                     |                     |
| 4. Years of education              | -.04<br>[-.10, .01]    | .34**<br>[.29, .38] | .06*<br>[.01, .11]  |                        |                     |                     |
| 5. Number of biological daughters  | .24**<br>[.19, .29]    | .03<br>[-.03, .08]  | .25**<br>[.20, .29] | -.08**<br>[-.13, -.03] |                     |                     |
| 6. Number of biological children   | .36**<br>[.32, .41]    | .01<br>[-.04, .07]  | .31**<br>[.27, .36] | -.10**<br>[-.16, -.05] | .74**<br>[.71, .76] |                     |
| 7. Proportion of endowment donated | -.07**<br>[-.12, -.02] | .21**<br>[.16, .26] | -.01<br>[-.06, .04] | .24**<br>[.19, .29]    | -.04<br>[-.09, .01] | -.05<br>[-.10, .00] |

Notes: Values in square brackets indicate the 95% CIs for each correlation. \*  $p < 0.05$ , \*\*  $p < 0.01$

**Table S3. The number of daughters, sons and children that participants had.**

|                     | Count | Frequency | Relative frequency |
|---------------------|-------|-----------|--------------------|
| Number of daughters | 0     | 701       | 0.48               |
|                     | 1     | 472       | 0.32               |
|                     | 2     | 221       | 0.15               |
|                     | 3     | 56        | 0.04               |
|                     | 4     | 8         | 0.01               |
|                     | >4    | 2         | 0.00               |
| Number of sons      | 0     | 738       | 0.51               |
|                     | 1     | 495       | 0.34               |
|                     | 2     | 186       | 0.13               |
|                     | 3     | 30        | 0.02               |
|                     | 4     | 9         | 0.01               |
|                     | >4    | 2         | 0.00               |
| Number of children  | 0     | 431       | 0.30               |
|                     | 1     | 291       | 0.20               |
|                     | 2     | 485       | 0.33               |
|                     | 3     | 173       | 0.12               |
|                     | 4     | 57        | 0.04               |
|                     | >4    | 23        | 0.02               |

**Table S4. Results of linear regression models predicting generosity, with standardized coefficients without experimental treatment factor recipient family origin.**

|                                                      | <b>Model 1</b>            | <b>Model 2</b>            | <b>Model 3</b>             | <b>Model 4</b>           |
|------------------------------------------------------|---------------------------|---------------------------|----------------------------|--------------------------|
| Intercept                                            | 0.00<br>[-0.05, 0.05]     | -0.09 *<br>[-0.16, -0.02] | -0.10 **<br>[-0.17, -0.03] | -0.19<br>[-0.40, 0.01]   |
| Number of daughters                                  | 0.02<br>[-0.05, 0.09]     | 0.06<br>[-0.03, 0.15]     | 0.01<br>[-0.08, 0.10]      | -0.02<br>[-0.18, 0.14]   |
| Number of children                                   | -0.07 *<br>[-0.14, -0.00] | -0.08 *<br>[-0.15, -0.01] | -0.04<br>[-0.11, 0.03]     | 0.02<br>[-0.10, 0.14]    |
| Female respondent                                    |                           | 0.16 ***<br>[0.07, 0.26]  | 0.18 ***<br>[0.09, 0.28]   | 0.29 ***<br>[0.14, 0.44] |
| Number of daughters ×<br>Female respondent           |                           | -0.06<br>[-0.15, 0.04]    | 0.01<br>[-0.09, 0.10]      | -0.01<br>[-0.17, 0.15]   |
| Married                                              |                           |                           | -0.08 **<br>[-0.13, -0.02] | -0.08<br>[-0.16, 0.01]   |
| Income                                               |                           |                           | 0.20 ***<br>[0.15, 0.26]   | 0.16 ***<br>[0.07, 0.25] |
| Education                                            |                           |                           | 0.17 ***<br>[0.12, 0.23]   | 0.22 ***<br>[0.14, 0.31] |
| Age                                                  |                           |                           | -0.02<br>[-0.07, 0.03]     | -0.03<br>[-0.11, 0.06]   |
| Religion = Catholic                                  |                           |                           |                            | 0.14<br>[-0.10, 0.38]    |
| Religion = Protestant                                |                           |                           |                            | 0.02<br>[-0.21, 0.26]    |
| Religion = Other                                     |                           |                           |                            | -0.05<br>[-0.30, 0.20]   |
| <b>Random Effects</b>                                |                           |                           |                            |                          |
| $\sigma^2$                                           | 0.03                      | 0.03                      | 0.03                       | 0.03                     |
| $\tau_{00}$                                          | 0.07 <sub>pid</sub>       | 0.07 <sub>pid</sub>       | 0.06 <sub>pid</sub>        | 0.06 <sub>pid</sub>      |
| ICC                                                  | 0.71                      | 0.71                      | 0.69                       | 0.71                     |
| N                                                    | 1460 <sub>pid</sub>       | 1460 <sub>pid</sub>       | 1368 <sub>pid</sub>        | 559 <sub>pid</sub>       |
| Observations                                         | 2918                      | 2918                      | 2734                       | 1116                     |
| Marginal R <sup>2</sup> / Conditional R <sup>2</sup> | 0.003 / 0.715             | 0.011 / 0.715             | 0.098 / 0.720              | 0.119 / 0.740            |
| Deviance                                             | 392.564                   | 379.654                   | 168.227                    | 48.141                   |
| AICc                                                 | 425.858                   | 429.876                   | 261.590                    | 154.947                  |
| log-Likelihood                                       | -207.919                  | -207.919                  | -119.747                   | -63.283                  |

*Notes:* 95% *CI*s are shown in brackets.  $\sigma^2$  shows the within-subjects standard deviation.  $\tau_{00}$  shows the between-subject standard deviation. ICC indicates the intra-class correlation, i.e., the proportion of variation between individuals ( $\tau_{00}$ ) explained by the overall variance ( $\sigma^2 + \tau_{00}$ ). Marginal  $R^2$  provides the variance explained only by fixed effects and conditional  $R^2$  provides the variance explained by the entire model, i.e., both fixed effects and random effects.  
\*  $p < 0.05$ , \*\*  $p < 0.01$ , \*\*\*  $p < 0.001$ .



**Table S5. Results of hurdle regression models predicting generosity without experimental treatment factor recipient family origin.**

|                                                                           | <b>Model 1</b>              | <b>Model 2</b>              | <b>Model 3</b>              | <b>Model 4</b>              |
|---------------------------------------------------------------------------|-----------------------------|-----------------------------|-----------------------------|-----------------------------|
| <b>Beta regression (conditional model)</b>                                |                             |                             |                             |                             |
| Intercept                                                                 | -0.41 ***<br>[-0.54, -0.27] | -0.55 ***<br>[-0.73, -0.36] | -0.46 ***<br>[-0.68, -0.25] | -0.83 ***<br>[-1.29, -0.37] |
| Precision                                                                 | 2.15                        | 2.15                        | 2.17                        | 2.15                        |
| Number of daughters                                                       | 0.11<br>[-0.03, 0.25]       | 0.13<br>[-0.05, 0.31]       | 0.09<br>[-0.08, 0.27]       | 0.03<br>[-0.30, 0.36]       |
| Number of children                                                        | -0.18 ***<br>[-0.28, -0.07] | -0.19 ***<br>[-0.29, -0.09] | -0.15 **<br>[-0.26, -0.04]  | -0.11<br>[-0.28, 0.06]      |
| Female respondent                                                         |                             | 0.25 *<br>[0.03, 0.48]      | 0.27 *<br>[0.04, 0.49]      | 0.52 **<br>[0.20, 0.85]     |
| Number of daughters ×<br>Female respondent                                |                             | -0.03<br>[-0.22, 0.16]      | 0.01<br>[-0.18, 0.20]       | 0.04<br>[-0.29, 0.37]       |
| Married                                                                   |                             |                             | -0.06<br>[-0.26, 0.14]      | 0.07<br>[-0.23, 0.38]       |
| Income                                                                    |                             |                             | 0.87 ***<br>[0.44, 1.31]    | 0.84 **<br>[0.21, 1.47]     |
| Education                                                                 |                             |                             | 0.08 ***<br>[0.04, 0.11]    | 0.07 *<br>[0.02, 0.12]      |
| Age                                                                       |                             |                             | -0.00<br>[-0.01, 0.00]      | -0.01<br>[-0.01, 0.00]      |
| Religion = Catholic                                                       |                             |                             |                             | 0.33<br>[-0.10, 0.75]       |
| Religion = Protestant                                                     |                             |                             |                             | 0.16<br>[-0.26, 0.57]       |
| Religion = Other                                                          |                             |                             |                             | -0.09<br>[-0.53, 0.36]      |
| <b>Logistic regression (hurdle model predicting non-perfect altruism)</b> |                             |                             |                             |                             |
| (Intercept)                                                               | 8.03 ***<br>[7.29, 8.77]    | 8.26 ***<br>[7.35, 9.18]    | 7.87 ***<br>[6.74, 9.00]    | 7.41 ***<br>[5.04, 9.78]    |
| Number of daughters                                                       | 0.06<br>[-0.52, 0.63]       | -0.09<br>[-0.81, 0.63]      | 0.03<br>[-0.76, 0.82]       | 0.10<br>[-1.36, 1.56]       |
| Number of children                                                        | -0.03<br>[-0.44, 0.38]      | -0.02<br>[-0.43, 0.40]      | -0.08<br>[-0.56, 0.40]      | -0.29<br>[-1.06, 0.49]      |

*Notes:* 95% CIs are shown in brackets. The conditional model was fitted using a beta regression for proportional data reflecting the degree of generosity. The estimates are under a logit-link function. The intercept shows the alpha and the precision the beta parameter. The hurdle model was fitted using a binomial regression (logistic) predicting keeping some (0) vs. keeping nothing (1). The estimates are under a logit-link function.  $\sigma^2$  shows the within-subjects standard deviation.  $\tau_{00}$  shows the between-subject standard deviation. ICC indicates the intra-class correlation, i.e. the proportion of variation between individuals ( $\tau_{00}$ ) explained by the overall variance ( $\sigma^2 + \tau_{00}$ ). Marginal  $R^2$  provides the variance explained only by fixed effects and conditional  $R^2$  provides the variance explained by the entire model, i.e., both fixed effects and random effects.

\*  $p < 0.05$ , \*\*  $p < 0.01$ , \*\*\*  $p < 0.001$ .

**Table S6. Results of linear and hurdle regression models: subset of people that either had no children or one child without experimental treatment factor recipient family origin.**

|                                  | Linear                   | Hurdle                                                                                 |
|----------------------------------|--------------------------|----------------------------------------------------------------------------------------|
|                                  |                          | <b>Beta regression<br/>(conditional model)</b>                                         |
| Intercept                        | 0.59 ***<br>[0.55, 0.63] | -0.35 **<br>[-0.59, -0.11]                                                             |
| Precision                        |                          | -2.26                                                                                  |
| One daughter                     | 0.01<br>[-0.07, 0.09]    | -0.15<br>[-0.60, 0.30]                                                                 |
| One son                          | -0.01<br>[-0.08, 0.07]   | 0.10<br>[-0.34, 0.54]                                                                  |
| Female respondent                | 0.07 *<br>[0.01, 0.12]   | 0.40 *<br>[0.09, 0.71]                                                                 |
| Married                          | -0.04<br>[-0.09, 0.01]   | 0.01<br>[-0.27, 0.30]                                                                  |
| Income                           | 0.18 ***<br>[0.09, 0.28] | 0.56<br>[-0.00, 1.12]                                                                  |
| Education                        | 0.02 ***<br>[0.01, 0.03] | 0.10 ***<br>[0.06, 0.15]                                                               |
| Age                              | -0.00<br>[-0.00, 0.00]   | -0.01 *<br>[-0.01, -0.00]                                                              |
| One daughter × Female respondent | -0.02<br>[-0.12, 0.09]   | -0.10<br>[-0.70, 0.50]                                                                 |
| One son × Female respondent      | 0.00<br>(-0.11, 0.10)    | -0.02<br>[-0.62, 0.57]                                                                 |
|                                  |                          | <b>Logistic regression<br/>(hurdle model<br/>predicting non-<br/>perfect altruism)</b> |
| Intercept                        |                          | 7.86 ***<br>[6.49, 9.24]                                                               |
| One daughter                     |                          | -0.30<br>[-2.36, 1.77]                                                                 |
| One son                          |                          | 0.37<br>[-1.80, 2.53]                                                                  |

*Notes:* 95% CIs are shown in brackets. In the hurdle model, the conditional model was fitted using a beta regression for proportional data reflecting the degree of generosity. The estimates are under a logit-link function. The first hurdle was fitted using a binomial regression (logistic) predicting keeping some (0) vs. keeping nothing (1). The estimates are under a logit-link function.  $\sigma^2$  shows the within-subjects standard deviation.  $\tau_{00}$  shows the between-subject standard deviation. ICC indicates the intra-class correlation, i.e. the proportion of variation between individuals ( $\tau_{00}$ ) explained by the overall variance ( $\sigma^2 + \tau_{00}$ ). Marginal  $R^2$  provides the variance explained only by fixed effects and conditional  $R^2$  provides the variance explained by the entire model, i.e., both fixed effects and random effects. \*  $p < 0.05$ , \*\*  $p < 0.01$ , \*\*\*  $p < 0.001$ .

**Table S7. Standardized regression models predicting generosity accounting for the experimental treatment factor recipient family origin.**

|                                                                | <b>Linear Model</b>         | <b>Hurdle Model</b>                                                                            |
|----------------------------------------------------------------|-----------------------------|------------------------------------------------------------------------------------------------|
|                                                                |                             | <b>Beta regression<br/>(conditional model)</b>                                                 |
| Intercept                                                      | -0.20 ***<br>[-0.28, -0.13] | -0.54 ***<br>[-0.76, -0.31]                                                                    |
| Precision                                                      |                             | -2.20                                                                                          |
| Number of daughters                                            | 0.01<br>[-0.08, 0.11]       | 0.09<br>[-0.10, 0.27]                                                                          |
| Female respondent                                              | 0.16 **<br>[0.06, 0.27]     | 0.27 *<br>[0.03, 0.51]                                                                         |
| Foreign recipient                                              | 0.21 ***<br>[0.15, 0.26]    | 0.15 *<br>[0.03, 0.27]                                                                         |
| Number of children                                             | -0.04<br>[-0.11, 0.03]      | -0.15 **<br>[-0.26, -0.05]                                                                     |
| Married                                                        | -0.08 **<br>[-0.13, -0.02]  | -0.06<br>[-0.26, 0.14]                                                                         |
| Income                                                         | 0.20 ***<br>[0.15, 0.26]    | 0.89 ***<br>[0.45, 1.32]                                                                       |
| Education                                                      | 0.17 ***<br>[0.12, 0.23]    | 0.08 ***<br>[0.04, 0.11]                                                                       |
| Age                                                            | -0.02<br>[-0.07, 0.03]      | -0.00<br>[-0.01, 0.00]                                                                         |
| Number of daughters ×<br>Female respondent                     | -0.02<br>[-0.12, 0.08]      | -0.00<br>[-0.21, 0.20]                                                                         |
| Number of daughters ×<br>Foreign recipient                     | -0.01<br>[-0.07, 0.05]      | 0.02<br>[-0.09, 0.12,]                                                                         |
| Female respondent × Foreign<br>recipient                       | 0.04<br>[-0.04, 0.11]       | 0.00<br>[-0.17, 0.17]                                                                          |
| Number of daughters × Female<br>respondent × Foreign recipient | 0.05<br>[-0.03, 0.12]       | 0.04<br>[-0.10, 0.19]                                                                          |
|                                                                |                             | <b>Logistic<br/>regression<br/>(hurdle model<br/>predicting<br/>non- perfect<br/>altruism)</b> |

|                                                             |  |                               |
|-------------------------------------------------------------|--|-------------------------------|
| Intercept                                                   |  | 20.64 ***<br>[18.36, 22.92]   |
| Number of daughters                                         |  | -2.43 **<br>[-4.10, -0.77]    |
| Female                                                      |  | -0.61<br>[-2.70, 1.48]        |
| Foreign recipient                                           |  | -10.05 ***<br>[-8.59, -11.52] |
| Number of children                                          |  | -0.03<br>[0.69, -0.75]        |
| Married                                                     |  | 0.25<br>[1.57, -1.06]         |
| Income                                                      |  | -2.12<br>[0.88, -5.13]        |
| Education                                                   |  | -0.16<br>[0.06, -0.37]        |
| Age                                                         |  | -0.00<br>[0.03, -0.04]        |
| Number of daughters × Female respondent                     |  | 2.91 **<br>[4.83, 0.98]       |
| Number of daughters × Foreign recipient                     |  | 2.56 ***<br>[3.86, 1.26]      |
| Female respondent × Foreign recipient                       |  | 0.22<br>[1.86, -1.42]         |
| Number of daughters × Female respondent × Foreign recipient |  | -3.05 ***<br>[-1.42, -4.68]   |

### Random Effects

|                         |      |       |
|-------------------------|------|-------|
| $\sigma^2$              | 0.02 | -0.03 |
| $\tau_{00 \text{ pid}}$ | 0.06 | 1.80  |
| ICC                     | 0.71 | 1.02  |
| $N_{\text{pid}}$        | 1368 | 1368  |
| Observations            | 2734 | 2734  |

|                                                      |               |               |
|------------------------------------------------------|---------------|---------------|
| Marginal R <sup>2</sup> / Conditional R <sup>2</sup> | 0.111 / 0.746 | 0.090 / 1.014 |
| AICc                                                 | 30.256        | -705.083      |
| log-Likelihood                                       | 162.058       | 381.863       |

*Notes:* 95% CIs are shown in brackets. Linear model shows standardized  $\beta$ . The conditional model was fitted using a beta regression for proportional data reflecting the degree of generosity. The estimates are under a logit-link function. The intercept shows the alpha and the precision the beta parameter. The hurdle model was fitted using a binomial regression (logistic) predicting keeping some (0) vs. keeping nothing (1). The estimates are under a logit-link function.  $\sigma^2$  shows the within-subjects standard deviation.  $\tau_{00}$  shows the between-subject standard deviation. ICC indicates the intra-class correlation, i.e. the proportion of variation between individuals ( $\tau_{00}$ ) explained by the overall variance ( $\sigma^2 + \tau_{00}$ ). Marginal R<sup>2</sup> provides the variance explained only by fixed effects and conditional R<sup>2</sup> provides the variance explained by the entire model, i.e., both fixed effects and random effects. \*  $p < 0.05$ , \*\*  $p < 0.01$ , \*\*\*  $p < 0.001$ .

**Table S8. Bayesian Analysis for Model 2 predicting donation size.**

| Predictors                         | <i>B</i>                |
|------------------------------------|-------------------------|
| Intercept                          | 27.55<br>[25.96, 29.14] |
| Number of daughters (1)            | 1.02<br>[-0.56, 2.64]   |
| Female participant (2)             | 3.28<br>[1.18, 5.26]    |
| Foreign donation (3)               | 3.64<br>[2.51, 4.72]    |
| Number of children (4)             | -1.03<br>[-1.94, -0.17] |
| 1 × 2                              | -1.30<br>[-3.04, 0.44]  |
| 1 × 3                              | -0.24<br>[-1.18, 0.70]  |
| 2 × 3                              | 0.03<br>[-1.45, 1.57]   |
| 1 × 2 × 3                          | 0.66<br>[-0.60, 1.92]   |
| <b>Random Effects</b>              |                         |
| $\sigma^2$                         | 61.62                   |
| $\tau_{00 \text{ pid}}$            | 173.03                  |
| ICC                                | 0.74                    |
| $N_{\text{pid}}$                   | 1460                    |
| Observations                       | 2918                    |
| Marginal $R^2$ / Conditional $R^2$ | 0.028 / 0.744           |

*Notes:* 95% *CI*s are shown in brackets.  $\sigma^2$  shows the within-subjects standard deviation.  $\tau_{00}$  shows the between-subject standard deviation. ICC indicates the intra-class correlation, i.e. the proportion of variation between individuals ( $\tau_{00}$ ) explained by the overall variance ( $\sigma^2 + \tau_{00}$ ). Marginal  $R^2$  provides the variance explained only by fixed effects and conditional  $R^2$  provides the variance explained by the entire model, i.e., both fixed effects and random effects.

\*  $p < 0.05$ , \*\*  $p < 0.01$ , \*\*\*  $p < 0.001$ .



**Table S9. Bayesian Analysis for Model 2 predicting donation size assuming a binary daughter predictor.**

| Predictors                         | <i>B</i>                |
|------------------------------------|-------------------------|
| Intercept                          | 28.56<br>[27.23, 29.90] |
| Has daughter (=1 yes, =0 no) (1)   | -0.11<br>[-1.57, 1.32]  |
| Female participant (2)             | 1.45<br>[0.18, 2.77]    |
| Foreign donation (3)               | 2.89<br>[2.05, 3.74]    |
| Number of children (4)             | -0.66<br>[-1.35, 0.03]  |
| 1 × 2                              | -0.56<br>[-1.99, 0.96]  |
| 1 × 3                              | 0.17<br>[-0.92, 1.25]   |
| 2 × 3                              | 0.99<br>[-0.07, 2.03]   |
| 1 × 2 × 3                          | 0.02<br>[-1.28, 1.26]   |
| Random Effects                     |                         |
| $\sigma^2$                         | 61.71                   |
| $\tau_{00 \text{ pid}}$            | 172.79                  |
| ICC                                | 0.74                    |
| $N_{\text{pid}}$                   | 1460                    |
| Observations                       | 2918                    |
| Marginal $R^2$ / Conditional $R^2$ | 0.020 / 0.743           |

*Notes:* 95% *CI*s are shown in brackets.  $\sigma^2$  shows the within-subjects standard deviation.  $\tau_{00}$  shows the between-subject standard deviation. ICC indicates the intra-class correlation, i.e. the proportion of variation between individuals ( $\tau_{00}$ ) explained by the overall variance ( $\sigma^2 + \tau_{00}$ ). Marginal  $R^2$  provides the variance explained only by fixed effects and conditional  $R^2$  provides the variance explained by the entire model, i.e., both fixed effects and random effects.

\*  $p < 0.05$ , \*\*  $p < 0.01$ , \*\*\*  $p < 0.001$ .

**Table S10. Bayesian Analysis for Model 2 predicting donation size assuming an ordered categorical daughter predictor.**

| Predictors                            | B                       |
|---------------------------------------|-------------------------|
| Intercept                             | 27.58<br>[26.07, 29.14] |
| Daughter (ordered cat.) (1)           | 1.52<br>[-0.45, 5.92]   |
| Female participant (2)                | 3.57<br>[1.35, 5.69]    |
| Foreign donation (3)                  | 3.55<br>[1.65, 5.46]    |
| Number of children (4)                | -1.00<br>[-1.64, -0.34] |
| 1 × 2                                 | -1.24<br>[-3.32, 0.92]  |
| 1 × 3                                 | -0.26<br>[-3.76, 2.80]  |
| 2 × 3                                 | 0.17<br>[-2.36, 3.03]   |
| 1 × 2 × 3                             | 0.88<br>[-2.34, 4.69]   |
| <i>Monotonic Effects</i>              |                         |
| simo_moordered_daughter1[1]           | 0.09<br>[0.01, 0.36]    |
| simo_moordered_daughter1[2]           | 0.06<br>[0.00, 0.35]    |
| simo_moordered_daughter1[3]           | 0.16<br>[0.01, 0.53]    |
| simo_moordered_daughter1[4]           | 0.08<br>[0.00, 0.42]    |
| simo_moordered_daughter1[5]           | 0.19<br>[0.01, 0.63]    |
| simo_moordered_daughter1[6]           | 0.23<br>[0.01, 0.69]    |
| simo_moordered_daughter:sexFemale1[1] | 0.27<br>[0.02, 0.60]    |
| simo_moordered_daughter:sexFemale1[2] | 0.08<br>[0.00, 0.36]    |
| simo_moordered_daughter:sexFemale1[3] | 0.08<br>[0.00, 0.38]    |
| simo_moordered_daughter:sexFemale1[4] | 0.15<br>[0.01, 0.52]    |
| simo_moordered_daughter:sexFemale1[5] | 0.13<br>[0.01, 0.50]    |

|                                                        |                      |
|--------------------------------------------------------|----------------------|
| simo_moordered_daughter:sexFemale1[6]                  | 0.12<br>[0.00, 0.50] |
| simo_moordered_daughter:conditionforeign1[1]           | 0.09<br>[0.00, 0.41] |
| simo_moordered_daughter:conditionforeign1[2]           | 0.09<br>[0.00, 0.43] |
| simo_moordered_daughter:conditionforeign1[3]           | 0.12<br>[0.00, 0.50] |
| simo_moordered_daughter:conditionforeign1[4]           | 0.16<br>[0.01, 0.63] |
| simo_moordered_daughter:conditionforeign1[5]           | 0.15<br>[0.01, 0.56] |
| simo_moordered_daughter:conditionforeign1[6]           | 0.15<br>[0.01, 0.59] |
| simo_moordered_daughter:sexFemale:conditionforeign1[1] | 0.08<br>[0.00, 0.44] |
| simo_moordered_daughter:sexFemale:conditionforeign1[2] | 0.12<br>[0.00, 0.47] |
| simo_moordered_daughter:sexFemale:conditionforeign1[3] | 0.14<br>[0.01, 0.51] |
| simo_moordered_daughter:sexFemale:conditionforeign1[4] | 0.12<br>[0.00, 0.51] |
| simo_moordered_daughter:sexFemale:conditionforeign1[5] | 0.15<br>[0.01, 0.56] |
| simo_moordered_daughter:sexFemale:conditionforeign1[6] | 0.17<br>[0.01, 0.61] |
| Observations                                           | 2918                 |
| R <sup>2</sup> Bayes                                   | 0.030                |

---

## Figures

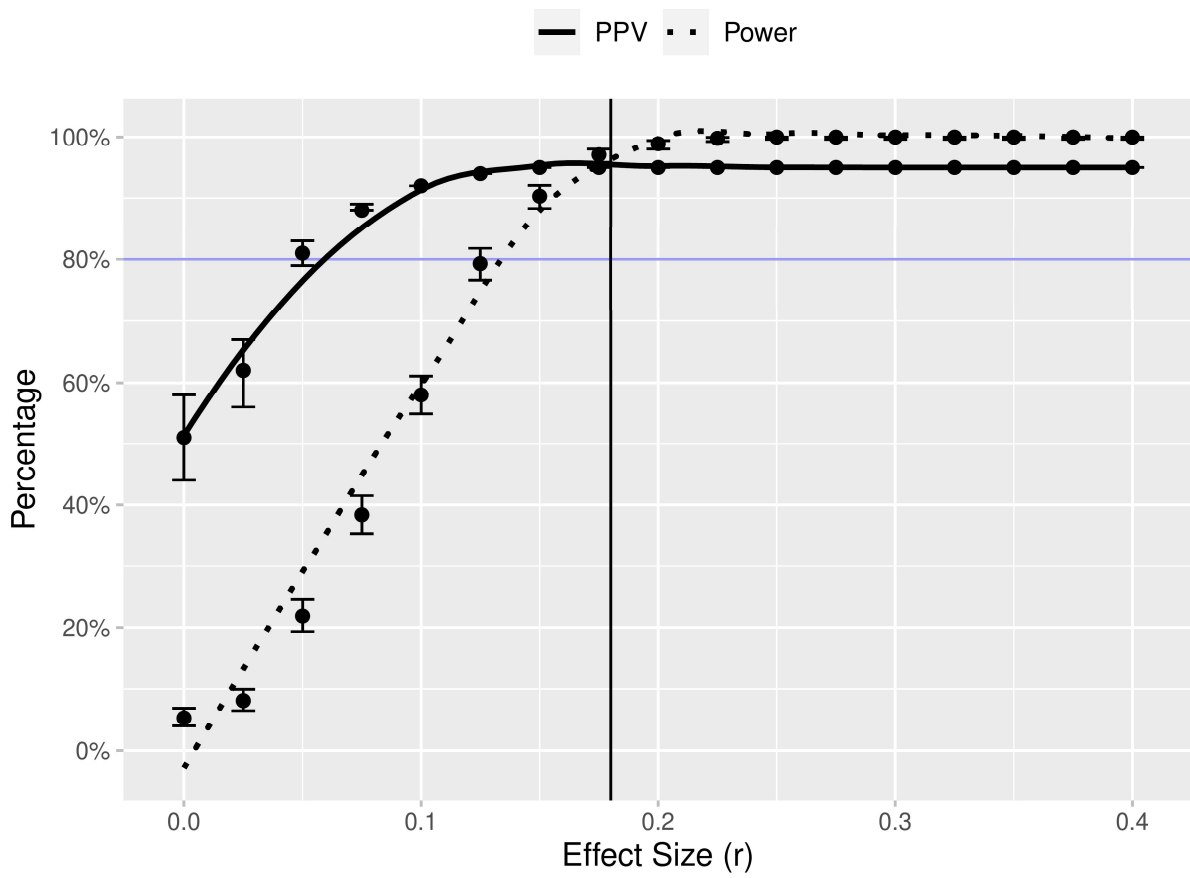

**Fig. S1. Curve for the power and positive predictive values.**

*Notes:* The horizontal blue line shows 80% power. The vertical black line shows the effect for being female.

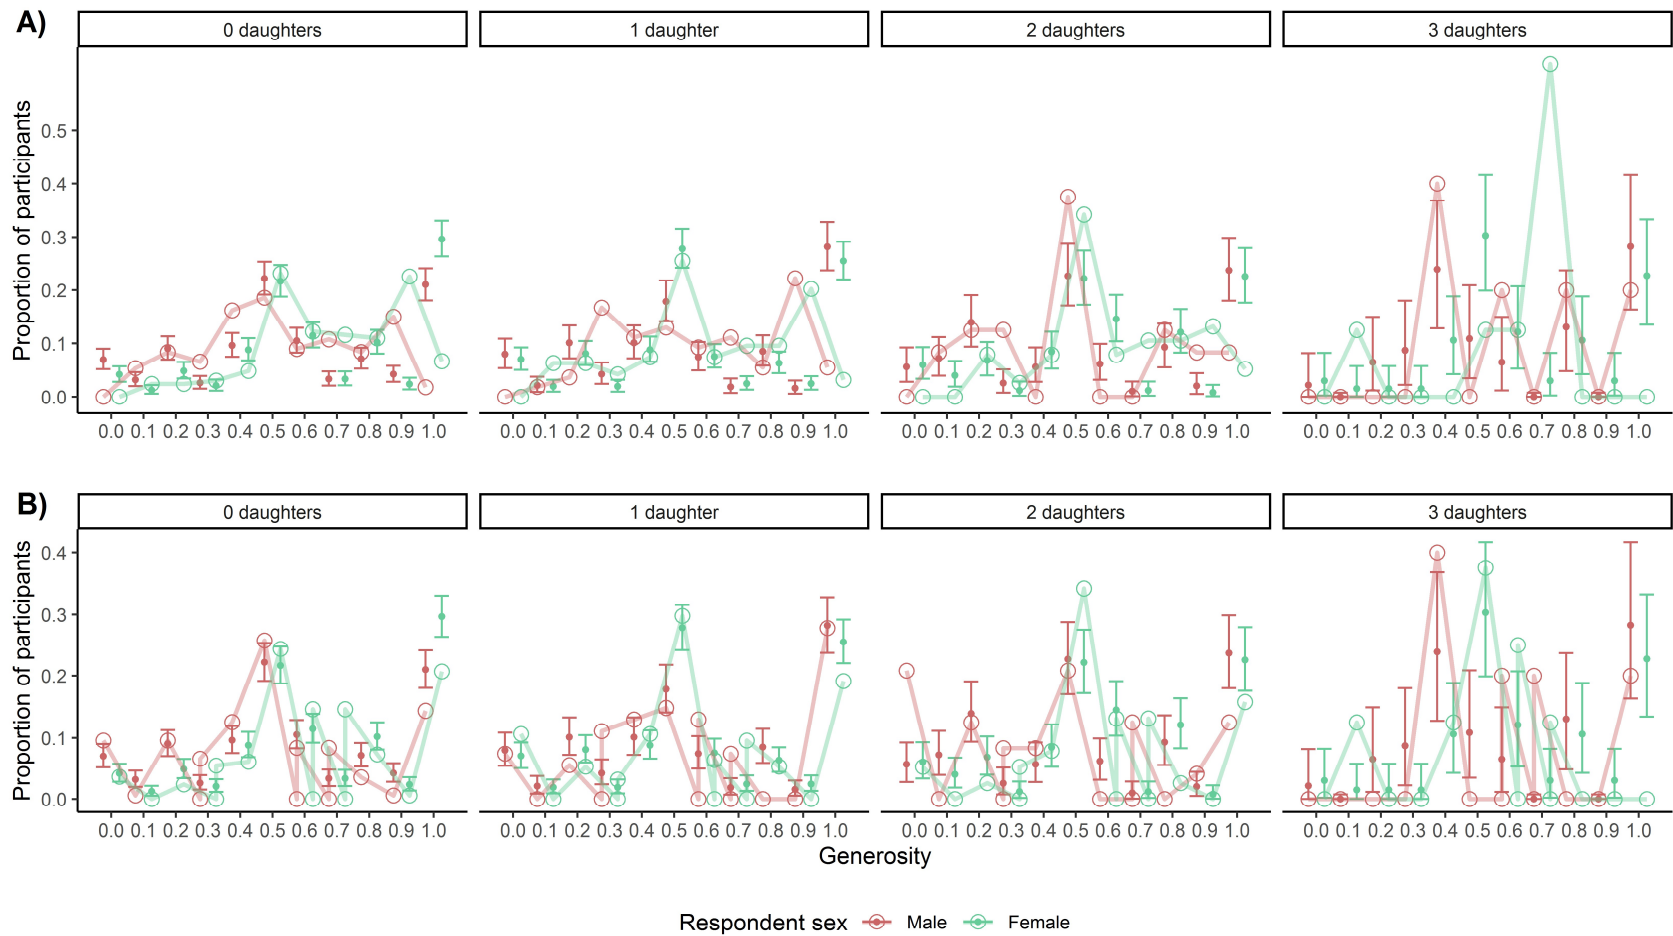

**Fig. S2. Observed and predicted selfishness depending on the number of daughters.**

*Notes:* The point and error bars show the observed proportion and 95% CIs for each level of generosity. The line and open point show the predicted proportion from the model. Panel A shows predictions from the linear model. Panel B shows predictions from the hurdle model.

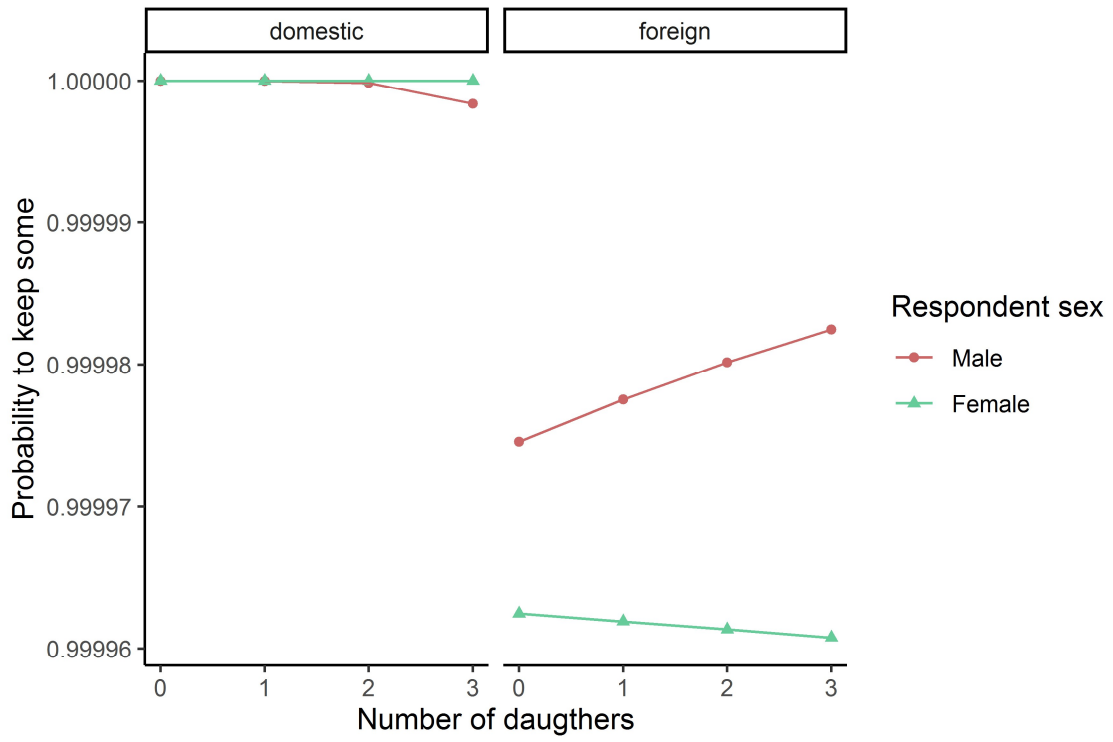

**Fig. S3. Plotted prediction of the interaction of target origin × respondent sex × number of daughters in the binomial part of the hurdle model.**
